# Supplementary material for: Tissue‐specific tumor microenvironments influence responses to immunotherapies
Source: PubMed Central journal article supplement — Clin Transl Immunology. 2019 Nov 21;8(11):e1094. doi: 10.1002/cti2.1094 (PMC6869967; doi:10.1002/cti2.1094), 2019-11-21

Supplementary Figure 1

**(a)** Isotype

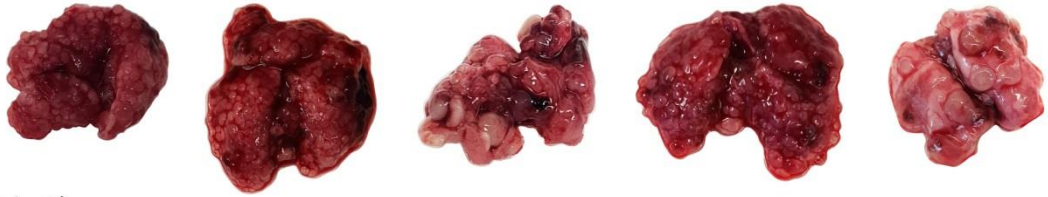

**(b)** trimAb

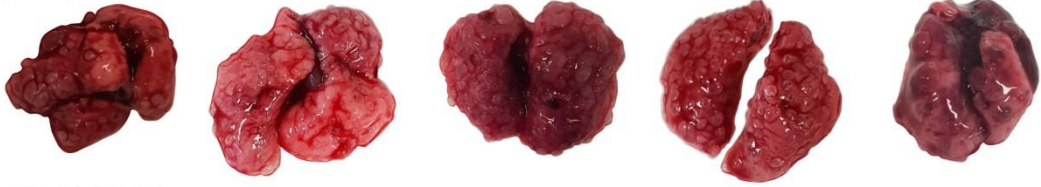

**(c)**  $\alpha$ PD-1/ $\alpha$ CTLA4

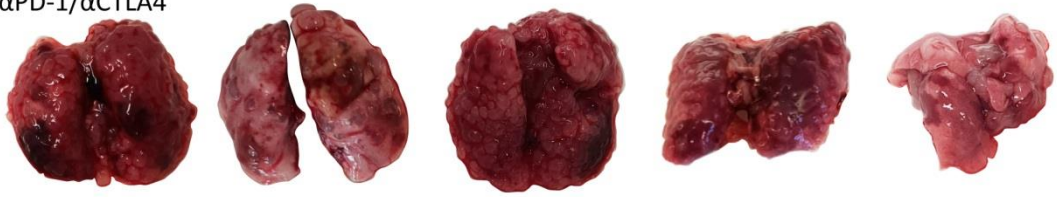

— = 1 cm

Supplementary figure 2

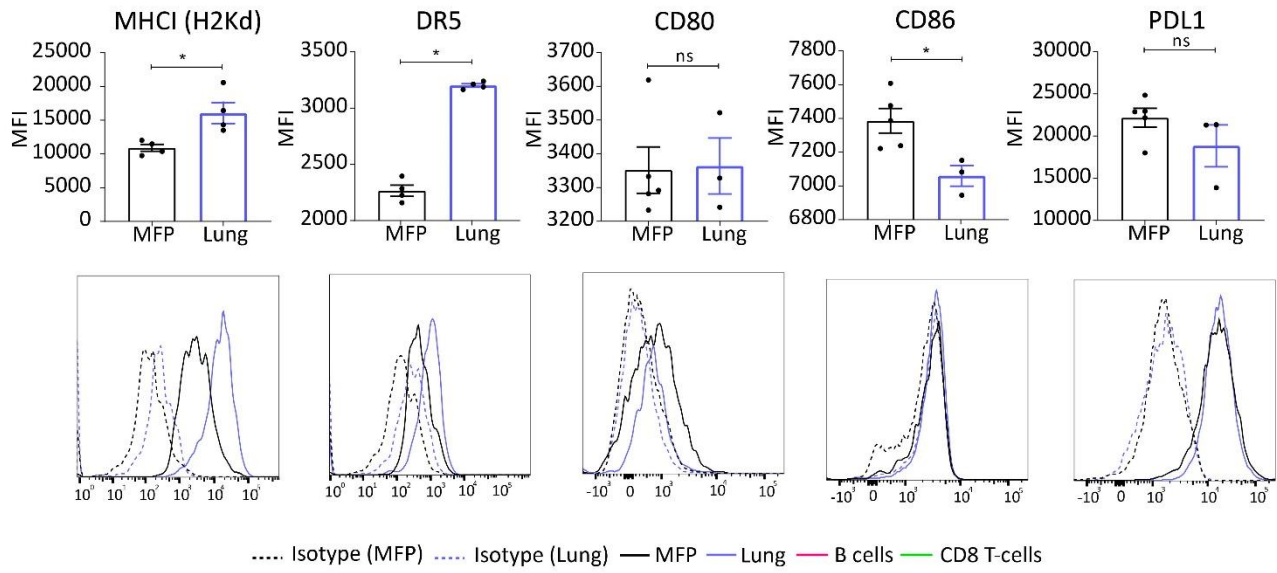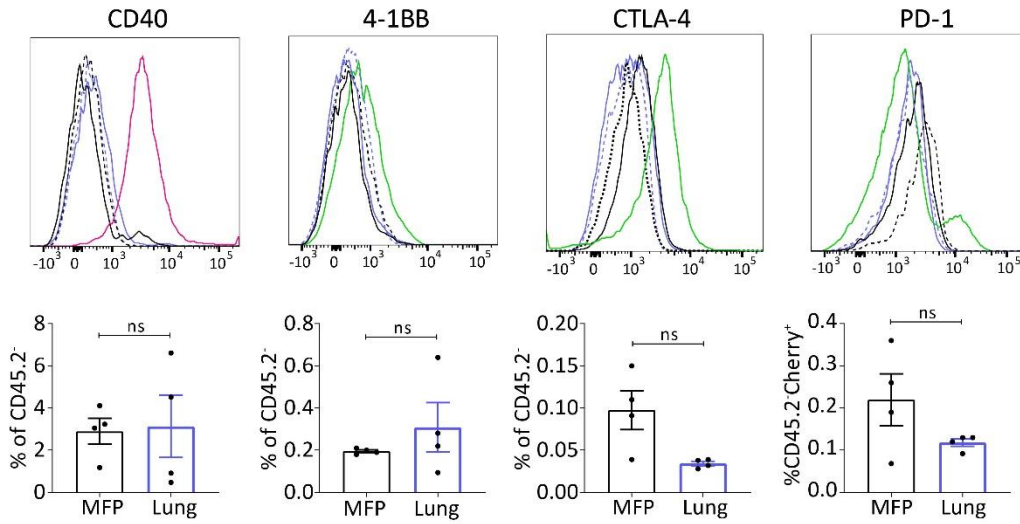

Supplementary figure 3

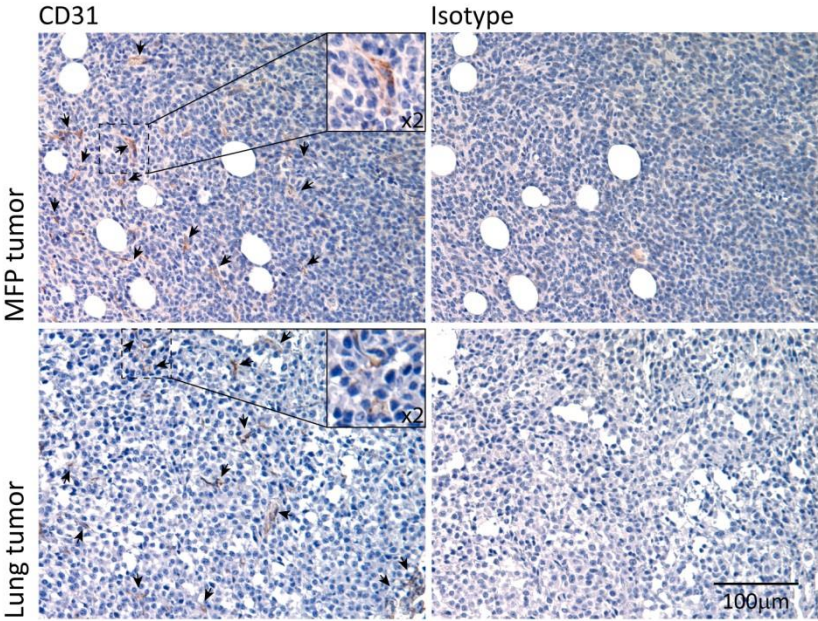

Supplementary Figure 4

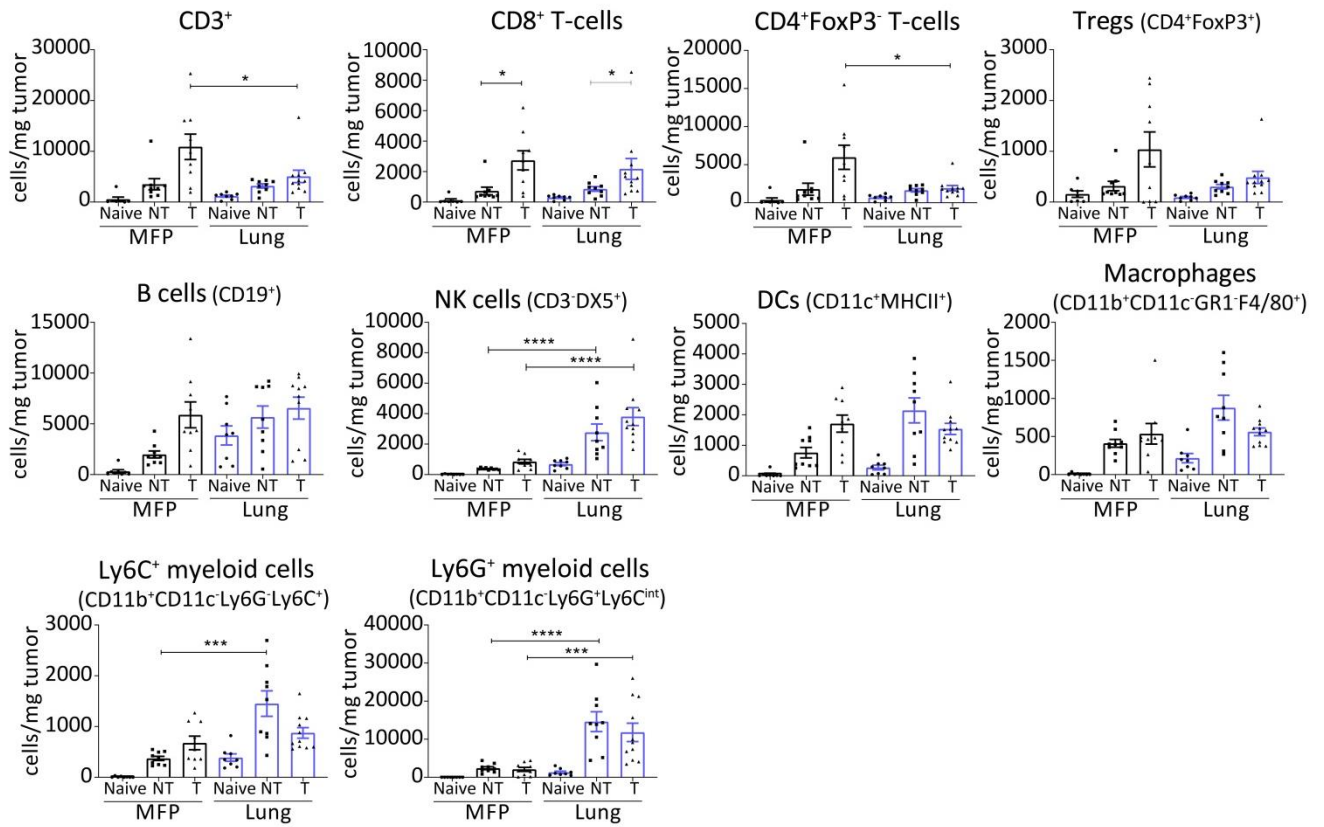

Supplementary Figure 5

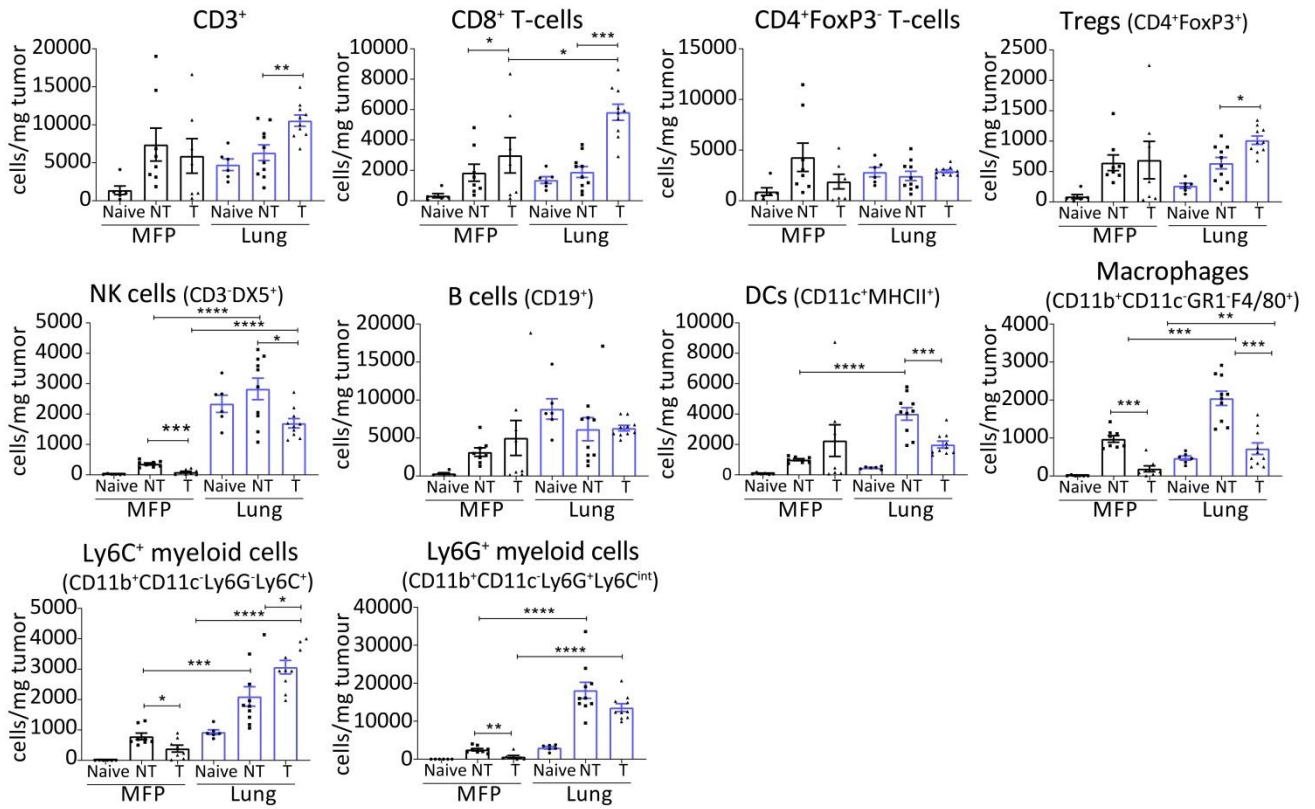



Supplementary Figure 6

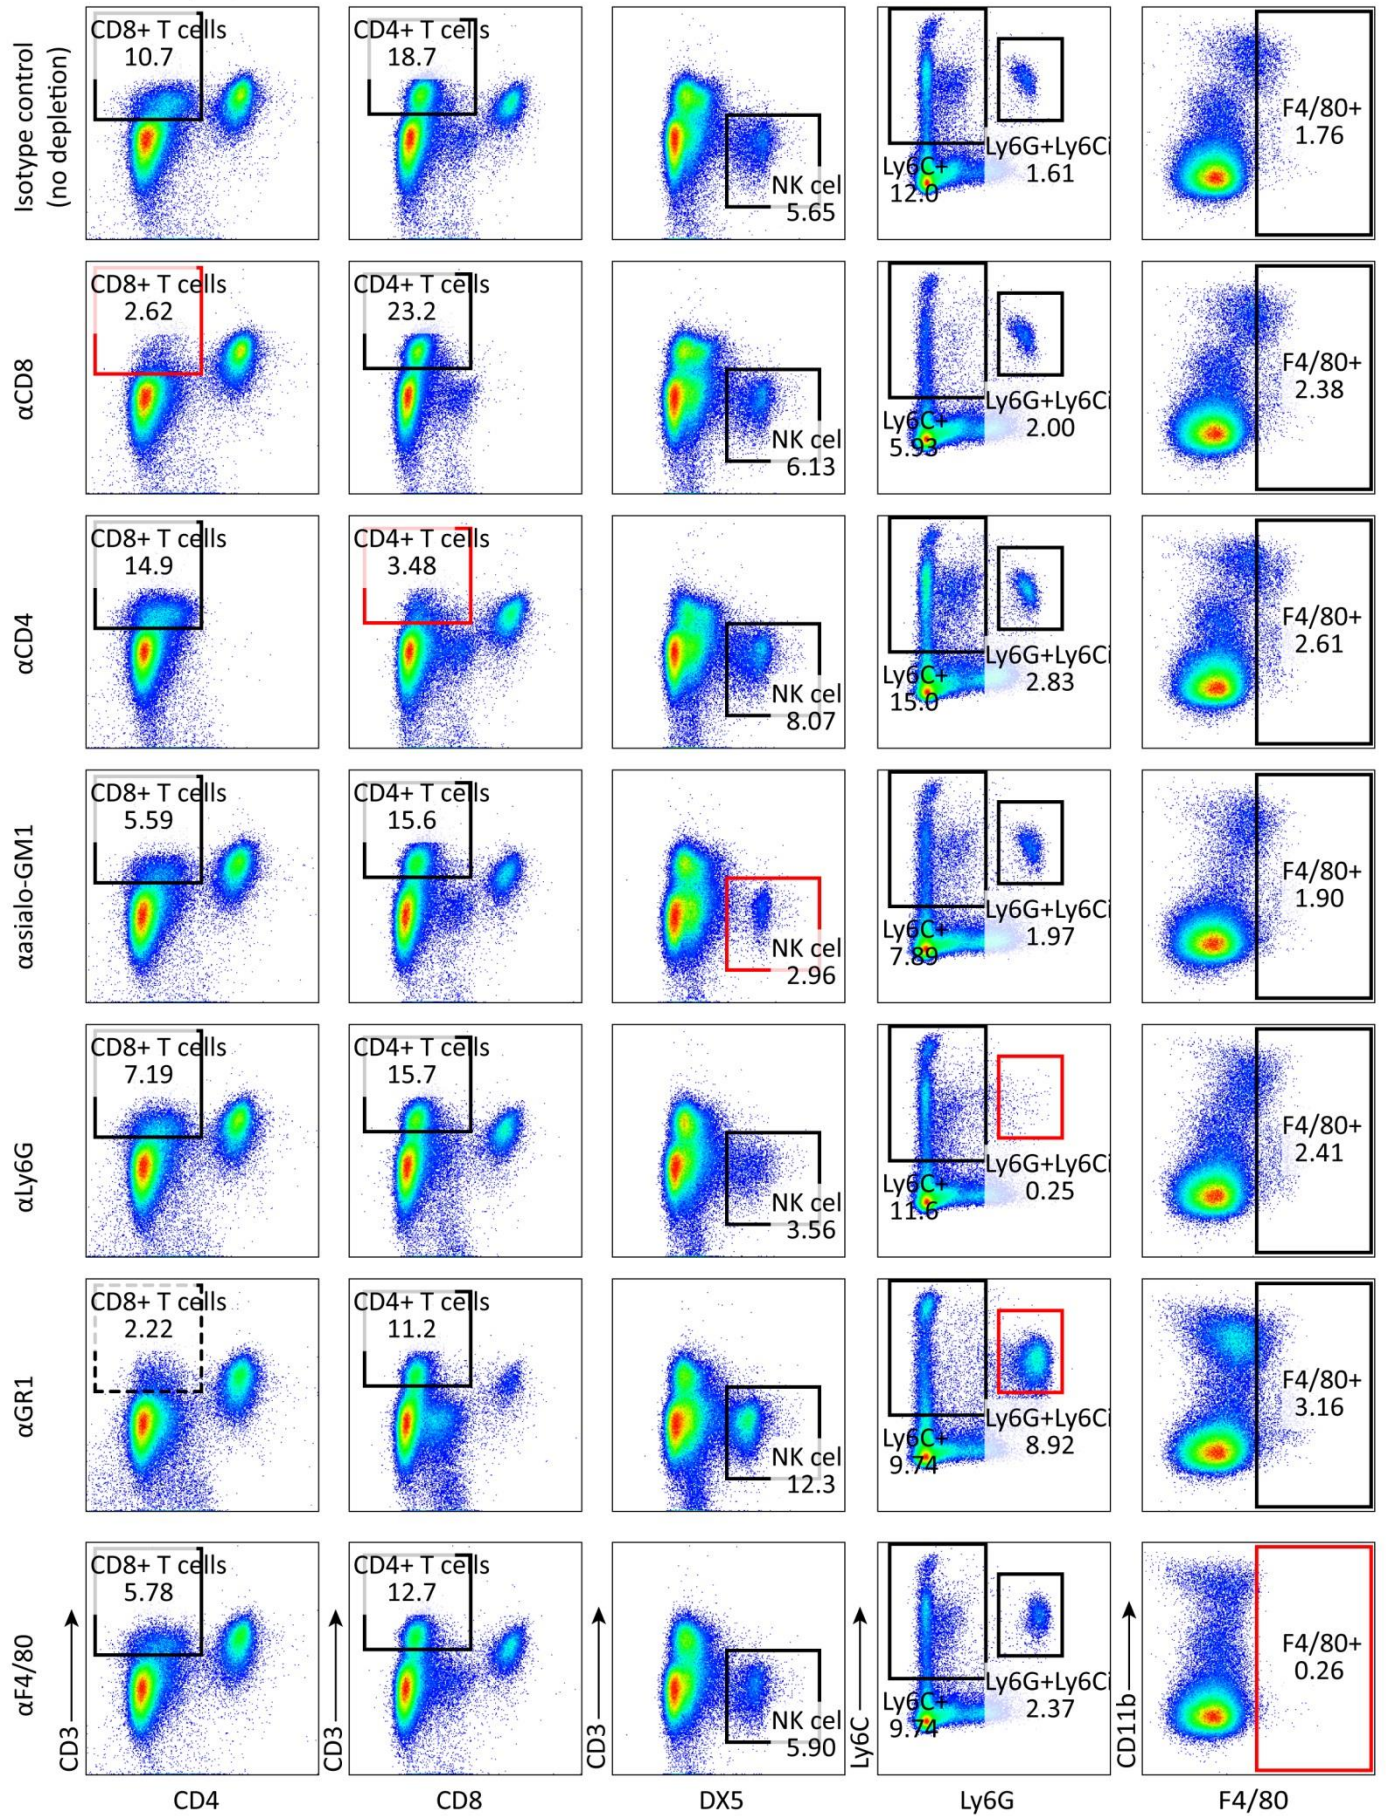

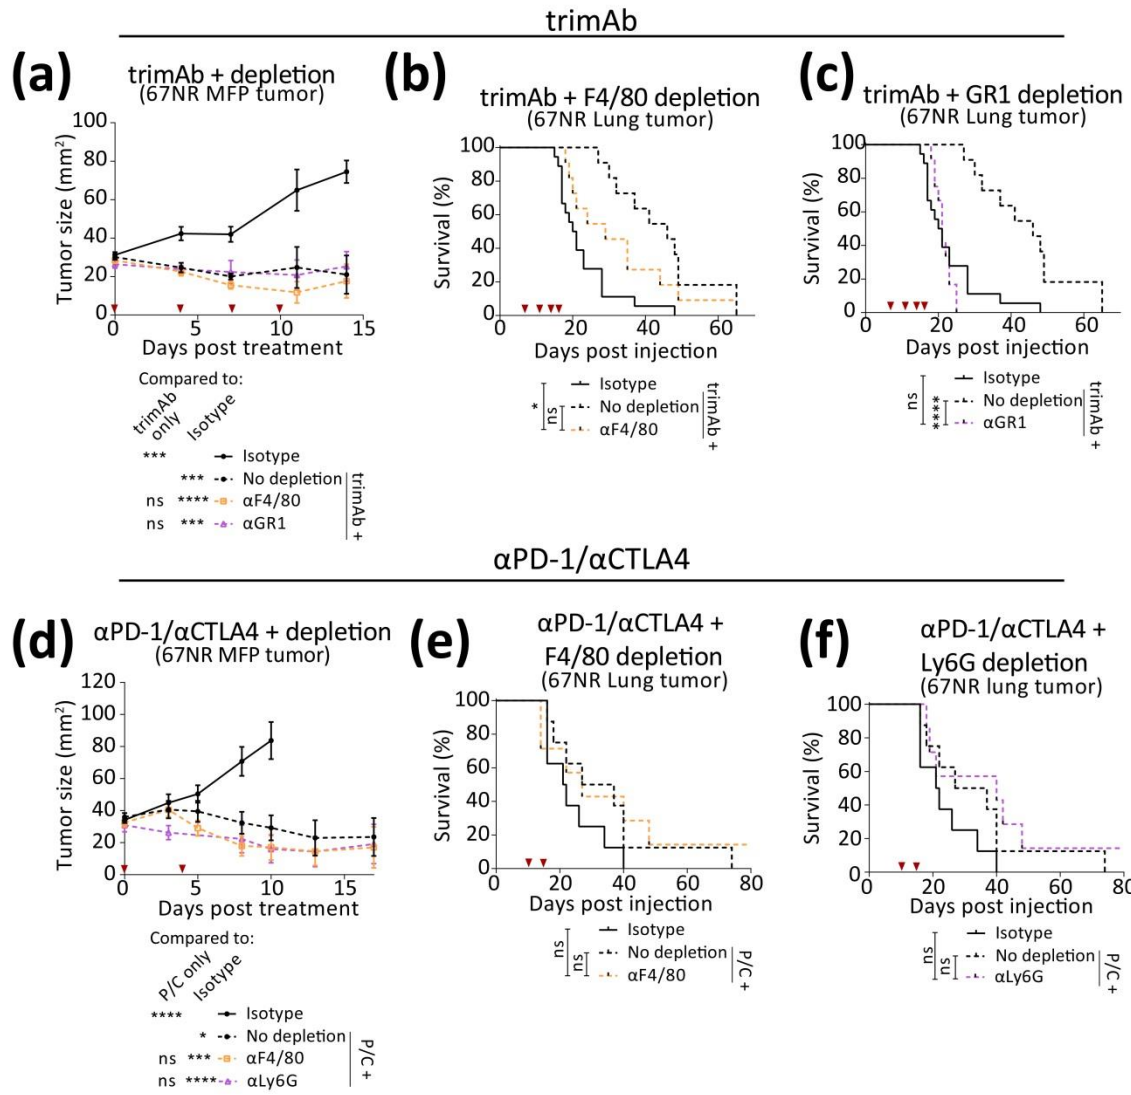

Supplement: CTI2-8-e1094-s001.pdf [file CTI2-8-e1094-s001.pdf]
